# Supplementary material for: Identification and Expression Analysis of the Isopentenyl Transferase (IPT) Gene Family under Lack of Nitrogen Stress in Oilseed (Brassica napus L.)
Source: MDPI journal article supplement (doi:10.3390/plants12112166), 2023-05-30
Supplement: s1 [file s1]

**Table S1.** Prediction of physicochemical properties and subcellular localization of BnIPT proteins.

| Gene ID                 | Name           | Number<br>of Amino<br>Acid | Mw<br>(KDa) | PI   | Gravy  | Subcellular<br>Localization                                |
|-------------------------|----------------|----------------------------|-------------|------|--------|------------------------------------------------------------|
| <i>BnaA01G0322000ZS</i> | <i>BnIPT1</i>  | 324                        | 36.89       | 8.50 | -0.335 | Chloroplast                                                |
| <i>BnaA02G0076800ZS</i> | <i>BnIPT2</i>  | 331                        | 37.61       | 5.75 | -0.223 | Chloroplast                                                |
| <i>BnaA02G0083300ZS</i> | <i>BnIPT3</i>  | 417                        | 47.80       | 5.70 | -0.474 | Cell membrane/<br>chloroplast/<br>Mitochondria/<br>Nucleus |
| <i>BnaA02G0174100ZS</i> | <i>BnIPT4</i>  | 348                        | 39.73       | 8.73 | -0.422 | Chloroplast/<br>Cytoplasm                                  |
| <i>BnaA03G0086000ZS</i> | <i>BnIPT5</i>  | 401                        | 46.18       | 6.14 | -0.451 | Chloroplasts/<br>Mitochondria                              |
| <i>BnaA03G0357200ZS</i> | <i>BnIPT6</i>  | 326                        | 36.93       | 9.02 | -0.303 | Chloroplast                                                |
| <i>BnaA04G0002800ZS</i> | <i>BnIPT7</i>  | 334                        | 37.34       | 8.11 | -0.137 | Chloroplast                                                |
| <i>BnaA04G0179800ZS</i> | <i>BnIPT8</i>  | 395                        | 44.15       | 5.87 | -0.375 | Chloroplast/<br>Cytoplasm                                  |
| <i>BnaA07G0075700ZS</i> | <i>BnIPT9</i>  | 332                        | 37.15       | 8.68 | -0.222 | Chloroplast/<br>Cytoplasm/<br>Mitochondria                 |
| <i>BnaA07G0275400ZS</i> | <i>BnIPT10</i> | 333                        | 37.76       | 8.91 | -0.335 | Chloroplast                                                |
| <i>BnaA09G0568800ZS</i> | <i>BnIPT11</i> | 332                        | 37.57       | 8.40 | -0.187 | Chloroplast                                                |
| <i>BnaA10G0183600ZS</i> | <i>BnIPT12</i> | 334                        | 37.89       | 6.35 | -0.236 | Chloroplast                                                |
| <i>BnaC01G0355800ZS</i> | <i>BnIPT13</i> | 319                        | 35.76       | 8.43 | -0.254 | Chloroplast                                                |
| <i>BnaC01G0398300ZS</i> | <i>BnIPT14</i> | 324                        | 36.76       | 8.84 | -0.327 | Chloroplast                                                |
| <i>BnaC02G0090600ZS</i> | <i>BnIPT15</i> | 334                        | 37.85       | 5.75 | -0.197 | Chloroplast/<br>Cytoplasm/<br>Mitochondria                 |
| <i>BnaC02G0099100ZS</i> | <i>BnIPT16</i> | 379                        | 43.49       | 5.40 | -0.562 | Chloroplast/<br>Cytoplasm/<br>Mitochondria                 |
| <i>BnaC02G0224500ZS</i> | <i>BnIPT17</i> | 348                        | 39.60       | 8.92 | -0.407 | Chloroplast/<br>Cytoplasm                                  |
| <i>BnaC03G0098500ZS</i> | <i>BnIPT18</i> | 463                        | 52.23       | 7.03 | -0.427 | Chloroplast                                                |
| <i>BnaC03G0435200ZS</i> | <i>BnIPT19</i> | 325                        | 37.06       | 8.87 | -0.344 | Chloroplast                                                |
| <i>BnaC04G0257300ZS</i> | <i>BnIPT20</i> | 334                        | 37.60       | 6.96 | -0.146 | Chloroplast                                                |
| <i>BnaC04G0479000ZS</i> | <i>BnIPT21</i> | 464                        | 52.46       | 5.79 | -0.548 | Chloroplast                                                |
| <i>BnaC06G0312200ZS</i> | <i>BnIPT22</i> | 332                        | 37.45       | 9.07 | -0.329 | Chloroplast/<br>Cytoplasm/<br>Mitochondria                 |
| <i>BnaC07G0117300ZS</i> | <i>BnIPT23</i> | 332                        | 37.17       | 8.90 | -0.212 | Chloroplast                                                |
| <i>BnaC08G0418800ZS</i> | <i>BnIPT24</i> | 332                        | 37.56       | 8.76 | -0.172 | Chloroplast                                                |
| <i>BnaC09G0474600ZS</i> | <i>BnIPT25</i> | 334                        | 37.94       | 6.56 | -0.215 | Chloroplast                                                |

|                                      |                |     |       |      |        |             |
|--------------------------------------|----------------|-----|-------|------|--------|-------------|
| <i>Bnascaffold0026G000</i><br>6100ZS | <i>BnIPT26</i> | 464 | 52.29 | 7.96 | -0.447 | Chloroplast |
|--------------------------------------|----------------|-----|-------|------|--------|-------------|

---
